# Supplementary material for: Epidemiology of Shiga Toxin-Producing Escherichia coli O157 in the Province of Alberta, Canada, 2009–2016
Source: PubMed Central journal article supplement (PMC6832344; doi:10.3390/toxins11100613), 2019-10-22
Supplement: toxins-11-00613-s001.pdf [file toxins-11-00613-s001.pdf]

## Supplementary Materials: Epidemiology of Shiga Toxin-Producing *Escherichia coli* O157 in the Province of Alberta, Canada, 2009–2016

Luiz F. Lisboa, Jonas Szelewicki, Alex Lin, Sarah Latonas, Vincent Li, Shuai Zhi, Brendon D. Parsons, Byron Berenger, Sumana Fathima and Linda Chui

**Table S1.** PCR primers and probes utilized in the study.

|                  | Sequence (5'–3')                       | Reference    |
|------------------|----------------------------------------|--------------|
| <i>stx1</i> -F   | CATCGCGAGTTGCCAGAAT                    |              |
| <i>stx1</i> -R   | GCGTAATCCCACGGACTCTTC                  | Chui [38]    |
| <i>stx1</i> -P   | FAM-CTGCCGGACACATAGAAGGAACTCATCA-TAMRA |              |
| <i>stx2</i> -F   | CCGGAATGCAAATCAGTC                     |              |
| <i>stx2</i> -R   | CAGTGACAAAACGCAGAAT                    | Chui [38]    |
| <i>stx2</i> -P   | FAM-ACTGAACTCCATTAACGCCAGATATGA-TAMRA  |              |
| <i>stx1a</i> -F  | CCTTTCCAGGTACAACAGCGGTT                |              |
| <i>stx1a</i> -R2 | GGAAACTCATCAGATGCCATTCTGG              | Scheutz [6]  |
| <i>stx1a</i> -F  | CTACGGCTTATTGTTGAACGAAAT               |              |
| <i>stx1a</i> -R  | GCTGTAACGTGGTATAGCTACTG                | Zhi [40]     |
| <i>stx1a</i> -P  | TT+TC+C+A+GG+T+AC                      |              |
| <i>stx2a</i> -F  | GCGATACTGR <b>B</b> ACTGTGGCC          |              |
| <i>stx2a</i> -R  | CCG <b>K</b> CAACCTTCACTGTAAATGTG      | Scheutz [6]  |
| <i>stx2a</i> -P  | GCCACCTTCACTGTGAATGTG                  |              |
| <i>stx2a</i> -F  | CTGTTAATGCAATGGCGGC                    |              |
| <i>stx2a</i> -R  | GCAAATCCGGAGCCTGA                      | Zhi [40]     |
| <i>stx2a</i> -P  | AG+G+AT+G+A+C+ACAT                     |              |
| <i>stx2c</i> -F  | GAAAGTCACAGTTTTTATATACAACGGGTA         |              |
| <i>stx2c</i> -R  | CCGGCCACYTTTACTGTGAATGTA               | Scheutz [6]  |
| <i>eae</i> -F    | CATTGATCAGGATTTTTCTGGTGATA             |              |
| <i>eae</i> -R    | CTCATGCGGAAATAGCCGTTA                  | Nielsen [37] |
| <i>eae</i> -P    | FAM-ATAGTCTCGCCAGTATTCGCCACCAATAC-BHQ  |              |

'+' denotes a locked nucleic acid (LNA). Bold-face letters denote ambiguous nucleotides.
